# Supplementary material for: Biomarkers Analysis and Clinical Manifestations in Comorbid Creutzfeldt–Jakob Disease: A Retrospective Study in 215 Autopsy Cases
Source: MDPI journal article supplement (doi:10.3390/biomedicines10030680), 2022-03-16
Supplement: s1 [file s1]

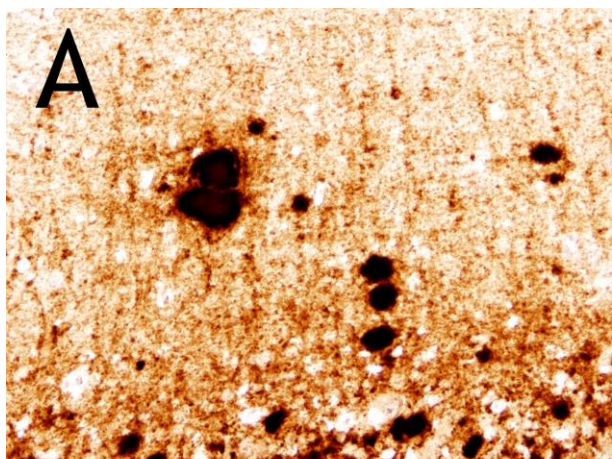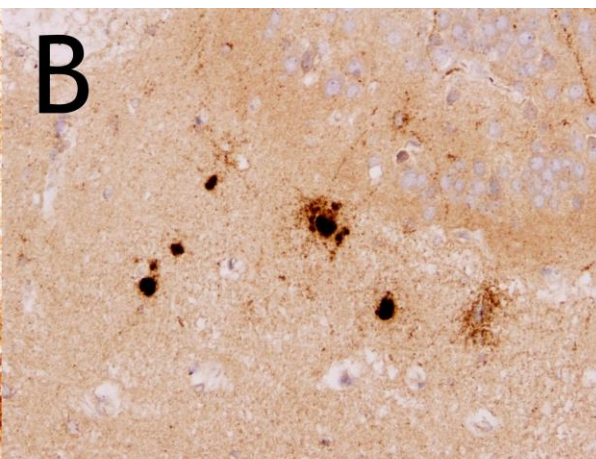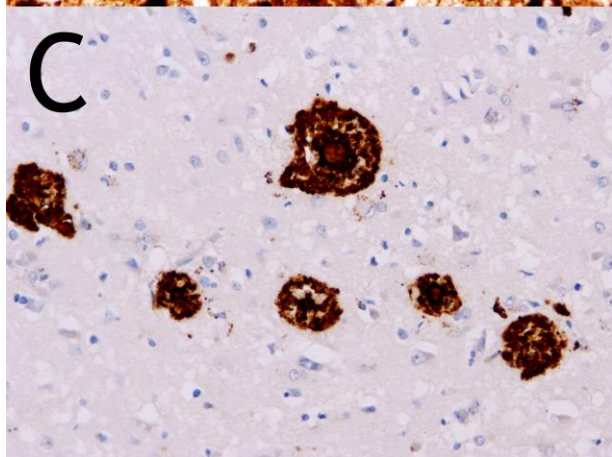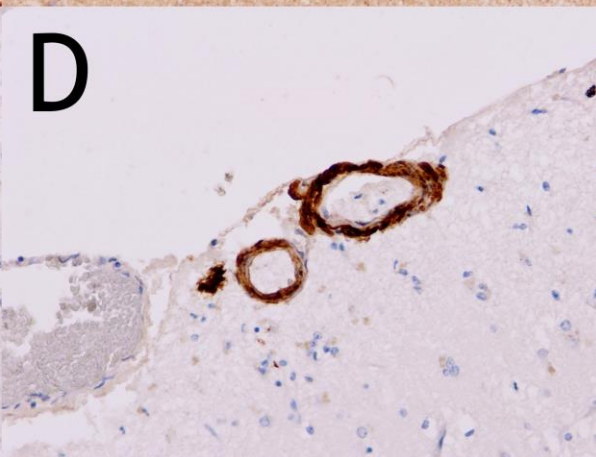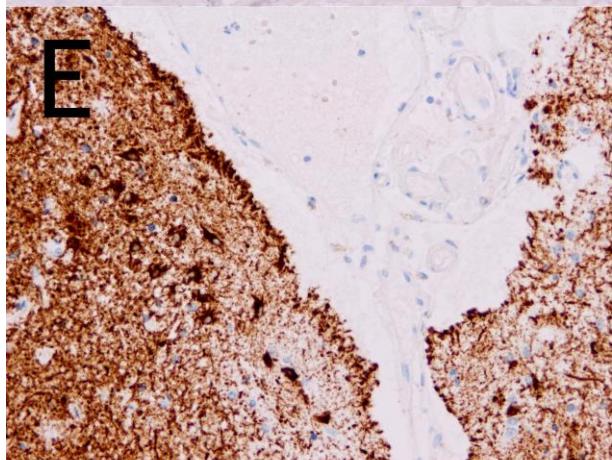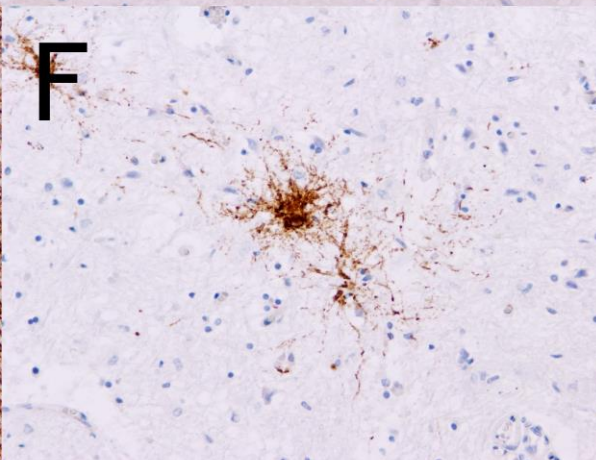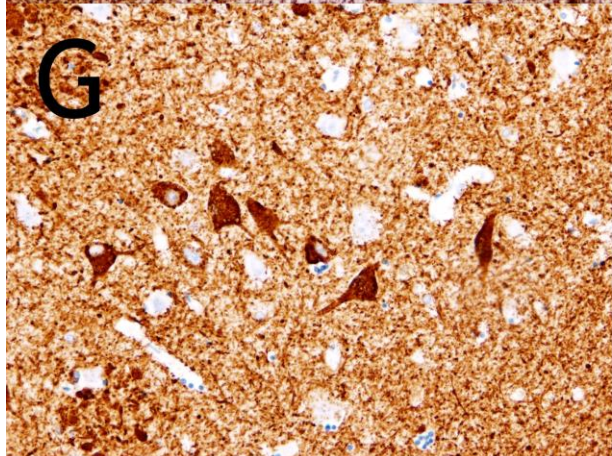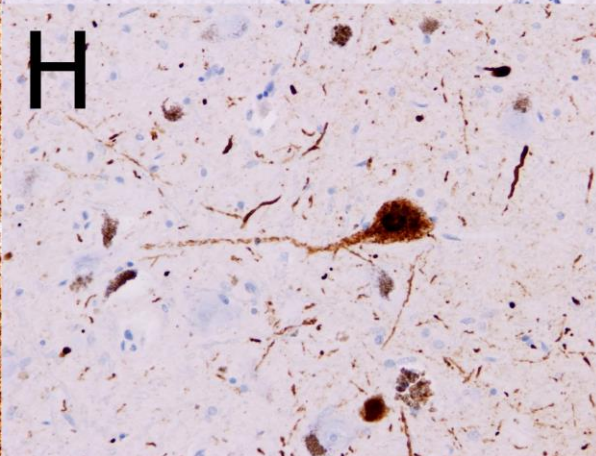

**Figure S3: Typical neuropathological hallmarks of CJD and its comorbid diseases:** (A+B) PrP-positive kuru-like plaques may be found in some CJD cases. (C) Extracellular cored neuritic A $\beta$  plaques are characteristic for Alzheimer's disease as well as (D) cerebral amyloid angiopathy. (E+F) Astrocytic inclusions characterize aging-related tau astrogliaopathy (magnification 100x and 400x, respectively). (G) Neurofibrillary tangles are crucial for neuropathological diagnosis of primary age-related tauopathy. (H)  $\alpha$ -synuclein positive Lewy bodies define Lewy body dementia.
