# Supplementary material for: Biomarkers Analysis and Clinical Manifestations in Comorbid Creutzfeldt–Jakob Disease: A Retrospective Study in 215 Autopsy Cases
Source: Biomedicines. 2022 Mar 16;10(3):680. doi: 10.3390/biomedicines10030680 (PMC8944998; doi:10.3390/biomedicines10030680)
Supplement: Supplementary file 1 [file biomedicines-10-00680-s001.zip › CJD_Supplementary (1).xlsx]

## Sheet: List1
Pure CJD
No.	Sex	Age	CJD var.	Genotype	WB PrP	Putamen	Ribonning	Koedam	Scheltens	Fazekas	dementia	py/expy	cerebell/visuospat	myoclon	akinet mutism	EEG periodic	14 3 3	h-tau	p-tau	Aβ
1	F	43	sCJD	MV	2	1	1	1	1	0	1	1	1	1	0	0	0	1170	27	178
2	F	71	sCJD	MM	1	1	1	0	1	1	1	1	1	1	0	0	1	1200	44	743
3	M	70	sCJD	MM	1	NA	NA	NA	NA	NA	1	1	1	1	1	0	1	1300	32	335
4	M	63	sCJD	MM	1	NA	NA	NA	NA	NA	1	0	0	0	1	1	0	NA	NA	NA
5	M	47	gCJD	VV	1	1	1	0	0	0	1	1	1	1	0	1	1	NA	NA	NA
6	F	58	gCJD	MM	1	0	0	0	0	0	1	1	0	1	1	NA	1	1200	59	799
7	M	60	sCJD	VV	2	1	1	1	1	0	1	1	1	0	0	NA	1	1200	100	1377
8	M	55	gCJD	MM	1	1	1	0	0	1	1	1	1	1	0	0	0	1200	44	342
9	F	65	sCJD	MM	1	NA	NA	0	0	NA	1	1	1	0	1	1	1	1350	94	1060					y
10	F	50	sCJD	MM	1	0	1	1	0	0	1	1	1	1	0	1	1	1200	18	471
11	M	40	sCJD	MV	1	1	1	1	0	1	1	1	1	1	0	0	1	NA	NA	NA
12	F	60	sCJD	MM	2	NA	NA	0	0	NA	1	1	0	0	1	1	1	600	45.7	421
13	F	59	sCJD	MM	1	1	1	1	0	0	1	1	1	1	1	1	1	1700	55	673
14	M	66	sCJD	MM	1	1	1	1	1	0	1	1	0	0	0	1	1	2500	48	1112
15	M	71	sCJD	MM	1	0	1	2	2	2	1	0	1	1	0	NA	1	1500	20	205
16	M	66	sCJD	MV	1	NA	NA	NA	NA	NA	1	1	1	1	0	0	0	581	52	954
17	M	67	sCJD	MM	1	NA	NA	1	0	NA	1	1	1	0	0	NA	1	NA	NA	NA
18	M	78	sCJD	MM	1	0	1	1	1.5	0	1	1	1	0	0	1	0	1500	59	1203
19	M	66	sCJD	MM	1	0	1	1	1	0	1	1	1	1	1	1	0	1200	19	394
20	M	60	sCJD	MM	2	0	0	0	0	2	1	1	1	0	1	NA	1	NA	NA	NA
21	M	47	sCJD	MV	1	0	0	0	0	0	1	1	1	1	0	NA	1	1200	42	484
22	F	54	sCJD	MM	1	1	1	0	0.5	0	1	1	1	1	0	1	0	1300	31	675
23	M	53	sCJD	MM	1	0	1	1	0	0	1	1	1	1	1	1	1	1500	34	596
24	M	65	sCJD	VV	1	1	1	1	1	2	1	0	1	0	0	NA	1	NA	NA	NA
CJD + tau
No.	Sex	Age	CJD var.	Genotype	WB PrP	Putamen	Ribonning	Koedam	Scheltens	Fazekas	dementia	py/expy	cerebell/visuospat	myoclon	akinet mutism	EEG periodic	14 3 3	h-tau	p-tau	Aβ	Taoupathy
25	F	81	sCJD	VV	1	1	1	1	2	1	1	0	1	0	0	0	1	1200	79	843	PART
26	M	59	sCJD	MM	1	0	0	0	0	0	1	1	1	1	1	0	1	920	35	960	PART
27	F	68	sCJD	VV	1	0	0	1	1	1	1	1	1	1	1	1	1	2500	80	879	PART
28	F	68	sCJD	MM	1	1	1	2	1	1	1	1	1	1	1	1	1	1300	75	1133	PART
29	M	62	gCJD	MM	2	1	1	0	0	1	1	1	0	1	0	1	1	NA	NA	NA	PART
30	M	56	gCJD	MV	1	1	1	2	1	2	1	1	1	1	1	1	0	1200	40	156	PART, ARTAG
31	F	61	sCJD	MM	1	1	1	0	1	1.5	1	1	1	1	1	1	1	2500	51	1063	PART
32	F	71	sCJD	VV	1	1	0	0	1	1	1	1	0	1	1	1	1	1200	166	1023	AGD
33	F	72	sCJD	MV	1	1	1	1	0	1	1	1	0	1	1	0	0	1300	39	613	AGD
34	F	65	sCJD	MV	2	1	1	2	1	1	1	1	1	0	1	0	1	1300	79	461	PART
35	M	72	gCJD	MM	1	1	1	2	2	1	1	0	1	1	1	0	1	NA	NA	NA	PART
36	F	53	gCJD	MV	1	1	1	1	1	1	1	1	1	1	1	1	1	1200	75	673	AGD
37	M	52	sCJD	VV	2	1	1	0	0	0	1	1	1	1	0	0	1	NA	NA	NA	PART
38	F	75	sCJD	MM	1	0	1	1	0	1	1	1	0	1	1	1	1	NA	NA	NA	PART
39	F	61	sCJD	MV	1	1	1	1	0	2	1	0	1	1	1	0	1	1300	78	1318	PART
40	F	74	sCJD	MM	1	0	0	0	1	0	1	1	0	1	0	1	1	NA	NA	NA	PART
41	M	59	sCJD	MV	1	1	1	0	1	0	1	0	1	0	0	1	1	1300	68	1582	PART
42	F	61	sCJD	MM	1	1	1	0	0	1	1	1	1	0	1	1	1	1200	41	812	PART, AGD
43	F	53	gCJD	MV	1	1	1	0	2	0	1	1	1	1	1	NA	1	NA	NA	NA	PART
44	M	72	sCJD	VV	2	1	1	2	0	0	1	1	1	1	1	0	0	1385	49	731	PART
45	F	74	gCJD	MM	1	NA	NA	1	0	NA	1	1	1	1	0	1	1	1200	41	987	PART
46	F	57	sCJD	MM	2	1	1	1	0	0	1	0	1	0	0	1	0	1500	114	1080	PART, AGD
47	M	58	sCJD	MV	1	1	1	1	0	0	1	1	0	0	0	0	0	1041	40	348	PART
48	M	65	sCJD	MM	1	0	1	0	0	0	1	1	0	1	1	1	1	1200	29	609	PART, AGD
49	F	68	sCJD	MM	1	1	1	0	0	0	1	1	0	0	1	1	1	1200	60	868	PART
50	M	63	sCJD	MM	2	1	1	0	1	1	1	1	1	1	1	1	1	1300	75	647	AGD
51	F	60	sCJD	MM	1	NA	NA	NA	NA	NA	1	1	1	1	1	1	1	NA	NA	NA	PART
52	M	59	sCJD	MM	2	1	1	0	0	0	1	1	1	1	0	0	1	NA	36	910	AGD
53	M	56	sCJD	MM	2	0	1	2	2	1	1	1	1	1	0	0	1	745	23	336	PART
54	F	71	sCJD	MM	1	NA	NA	0	0	NA	1	1	0	0	0	0	0	195	20	640	AGD
55	F	59	sCJD	MM	1	1	0	0	0	0	1	1	1	1	0	1	1	NA	NA	NA	PART
56	M	75	sCJD	MM	1	NA	NA	1	1	NA	1	1	1	1	0	NA	1	1500	101	735	PART
57	M	68	sCJD	MV	1	0	1	1	1	2	1	1	1	0	0	0	0	50	46.2	639	AGD
58	M	67	sCJD	MM	1	1	1	1	0	2	1	1	0	0	0	NA	1	1200	73	426	AGD
59	M	51	gCJD	MV	1	1	1	0	1	0	1	1	1	1	0	1	1	1200	68	523	ARTAG
60	F	71	sCJD	MM	1	1	1	0	0	1	1	1	1	1	1	1	1	1200	53	663	PART
61	M	70	sCJD	MM	1	NA	NA	NA	NA	NA	1	1	1	1	0	1	1	NA	NA	NA	PART
62	F	64	sCJD	MV	2	0	0	0	0	0	1	1	1	0	1	0	1	NA	NA	NA	PART, AGD
63	M	64	sCJD	MV	1	1	1	2	1	0	1	1	1	0	0	1	0	1200	35	551	AGD
64	F	70	sCJD	MM	1	1	1	0	0	1	1	1	0	0	0	1	1	NA	NA	NA	PART
65	F	62	sCJD	MV	2	1	0	0	1	1	1	1	0	0	0	0	1	NA	NA	NA	PART
66	F	75	gCJD	MM	1	1	1	2	2	0	1	1	0	0	0	1	1	1500	44	841	PART
67	F	62	sCJD	MM	2	1	1	1	1	1	1	0	1	1	1	0	1	1200	82	747	AGD
68	M	63	sCJD	MV	2	1	1	1	3	0	1	1	0	0	0	NA	1	1394	35	139	ARTAG, AGD
69	M	65	sCJD	MM	1	1	0	0	0	1	1	1	0	1	0	1	1	NA	NA	NA	PART
70	M	61	sCJD	MM	1	1	1	1	0	0	1	1	1	1	0	NA	0	1200	20	356	PART
71	M	68	sCJD	MM	1	NA	NA	0	0	NA	1	1	1	1	0	1	0	1200	52	767	PART
72	M	68	sCJD	MM	1	1	1	1	1	1	1	1	1	1	0	1	1	2500	36	874	PART
73	F	56	sCJD	MM	1	0	0	0	0	2	1	1	1	1	0	1	1	1200	59	812	AGD
74	F	56	sCJD	MM	2	1	1	1	2	0	1	0	1	0	0	1	0	1400	68	775	AGD
75	F	62	sCJD	VV	2	1	1	1	0	1	1	1	1	0	1	NA	1	NA	NA	NA	AGD
76	F	67	sCJD	MM	1+2	0	1	1	0	1	1	1	1	0	0	1	1	1500	73	659	PART
77	F	70	sCJD	MM	1	1	1	1	1	2	1	1	0	0	0	1	1	NA	NA	NA	PART, ARTAG
78	M	60	sCJD	MV	1	0	0	1	1	1	1	1	0	0	1	NA	1	NA	NA	NA	PART
79	F	63	sCJD	MM	1	0	1	1	1	1	1	1	1	0	0	1	0	1500	40	437	AGD
80	F	62	sCJD	MV	2	1	1	1	0	0	1	1	1	0	0	0	1	1200	41	574	PART, ARTAG
81	F	62	sCJD	MM	2	0	1	1	0	1	1	1	1	0	0	1	0	1500	83	921	AGD
82	F	61	sCJD	MM	2	0	1	0	0	1	1	1	1	0	0	1	0	563	42	909	PART, AGD
83	F	63	sCJD	MM	1	1	1	0	0	1	1	1	1	1	0	1	0	NA	NA	NA	PART
84	M	53	sCJD	MM	1	0	0	0	0	0	1	1	1	1	0	1	1	1200	33	941	PART
85	M	57	sCJD	MM	1	1	1	1	1	1	1	0	1	0	0	1	1	1300	75	1162	PART
86	M	57	sCJD	VV	1	1	1	0	0	0	1	0	1	1	0	1	1	1750	87	202	AGD
87	F	65	sCJD	MV	2	1	1	0	2	2	1	0	0	1	1	NA	1	1200	41	258	PART
88	M	49	sCJD	MM	1	1	1	0	1	0	1	1	1	1	1	1	1	1200	19	294	PART
89	M	71	sCJD	MM	1	0	1	0	0	1	1	1	1	1	0	1	1	2500	46	901	PART
90	M	71	sCJD	MM	2	1	1	1	1	0	1	1	0	0	1	1	1	1200	55	776	PART
91	F	70	sCJD	VV	1	0	0	0	0	1	1	1	1	0	1	1	1	NA	NA	NA	AGD
92	F	58	sCJD	MM	2	1	1	0	0	0	1	1	1	1	1	1	1	1500	42	471	PART
93	M	74	sCJD	MM	1	0	1	1	1	0	1	1	1	0	1	1	1	1300	53	1254	PART
94	F	53	sCJD	MM	1	1	1	1	0	1	1	1	1	0	1	0	1	NA	NA	NA	PART
95	F	52	gCJD	MM	2	NA	NA	NA	NA	NA	1	1	1	1	1	1	1	NA	NA	NA	AGD
96	M	57	sCJD	MV	1	1	0	0	0	1	1	1	1	1	0	1	1	1200	66	1407	PART
97	F	70	sCJD	MV	2	1	1	0	0	1	1	1	0	0	1	1	1	1200	48	927	PART
98	M	65	sCJD	MM	2	0	0	0	1	0	1	0	1	1	0	0	1	153	30	448	PART, AGD
99	F	65	sCJD	MM	1	1	0	0	0	0	1	1	1	0	0	NA	0	497	95	475	PART
100	M	68	sCJD	MM	1	1	1	0	0	0	1	1	1	1	1	1	1	2500	45	884	PART
101	F	70	sCJD	VV	1	1	0	0	0	0	1	1	1	1	0	0	1	1300	72	1199	PART
102	M	79	sCJD	MM	1	NA	NA	1	1	NA	1	0	0	1	1	1	1	NA	NA	NA	PART, ARTAG
103	F	66	sCJD	MM	1	1	1	0	1	1	1	1	1	0	1	1	1	1200	37	600	PART
104	F	62	sCJD	MM	1	1	1	1	1	0	1	1	0	1	0	1	1	1200	60	619	AGD
105	M	68	sCJD	MV	1	1	1	1	0	1	1	1	1	1	0	1	1	1200	35	749	PART
106	M	60	sCJD	MM	1	1	1	1	1	2	1	1	1	1	1	NA	1	1200	58	767	PART
107	F	63	sCJD	MM	1	0	1	0	0	0	1	1	1	1	0	1	1	1200	31	473	PART
108	F	76	sCJD	MM	1	1	1	0	1	3	1	1	1	0	1	NA	1	1500	28	699	PART
109	M	52	sCJD	MV	1	NA	NA	NA	NA	NA	1	NA	1	NA	NA	NA	1	754	36	801	PART
110	F	65	sCJD	MM	1	NA	NA	1	0	NA	1	1	0	1	0	1	1	2500	47	698	AGD
111	M	73	sCJD	MV	1	0	1	0	0	0	1	1	0	1	1	1	0	NA	NA	NA	PART
112	F	60	gCJD	MM	2	NA	NA	0	0	NA	1	1	1	1	0	1	0	NA	30	317	PART
113	M	68	sCJD	VV	2	1	1	0	1	1	1	1	0	1	0	1	1	1200	42	351	PART
114	M	53	sCJD	MV	1	1	0	1	0	0	1	1	1	1	1	NA	1	NA	NA	NA	PART
115	M	54	sCJD	MM	2	1	1	0	0	0	1	1	1	1	1	1	1	1200	49	590	AGD
116	M	71	sCJD	MV	1	NA	NA	0	0	NA	1	1	0	0	1	NA	1	NA	NA	NA	PART, AGD
117	F	65	sCJD	MM	1	1	1	0	0	3	1	1	1	1	1	1	1	NA	NA	NA	PART
118	F	69	sCJD	MM	1	1	1	0	0	0	1	1	1	1	1	0	0	2500	19	490	PART
119	M	69	sCJD	VV	1	0	0	0	0	1	1	1	1	1	0	0	1	1200	63	639	PART
120	F	74	sCJD	MM	1	1	1	1	1	1	1	1	0	1	1	0	1	1300	31	574	PART
121	M	68	sCJD	MV	1	1	1	2	2	2	1	1	1	1	0	NA	0	1200	83	700	PART, ARTAG, AGD
122	M	72	sCJD	MM	1	1	1	0	1	0	1	1	1	1	1	1	0	1200	37	547	ARTAG, AGD
123	F	56	sCJD	MM	2	0	0	0	0	0	1	1	1	1	1	1	1	1350	22	275	PART
124	F	63	sCJD	MM	1+2	NA	NA	1	0	NA	1	1	0	0	1	NA	1	1500	44	841	PART, AGD
125	F	49	gCJD	MV	1	1	1	0	1	1	1	1	0	1	0	0	0	941	51	635	AGD
126	F	62	gCJD	VV	2	1	0	1	0	1	1	1	1	1	1	1	1	1200	20	518	AGD
127	M	70	sCJD	MM	2	1	1	0	1	1	1	1	1	1	0	0	1	1200	50	1160	PART
128	F	57	sCJD	MM	1	1	1	0	0	0	1	NA	1	1	1	NA	1	2500	63	981	PART
129	F	52	sCJD	MM	2	1	0	1	0	0	1	1	1	0	1	1	1	1300	35	841	AGD
130	F	62	sCJD	MM	1	1	1	0	0	1	1	1	1	1	1	1	1	NA	NA	NA	PART
131	M	77	sCJD	MM	1	1	1	1	2	0	1	1	1	0	1	1	1	NA	NA	NA	PART, ARTAG
132	M	60	sCJD	MM	1	1	0	0	0	0	1	1	1	1	0	0	1	1200	17	318	PART
133	M	65	sCJD	MM	1	0	1	1	1	0	1	1	1	0	1	1	1	1200	48	301	PART
134	F	52	gCJD	MV	1	1	1	0	1	0	1	1	1	1	0	0	1	NA	NA	NA	AGD
135	F	70	sCJD	MV	2	0	1	0	1	1	1	0	1	0	0	1	0	1300	63	991	PART
136	F	67	sCJD	MM	2	1	1	1	1	2	1	1	1	0	0	1	1	174	30	594	PART
137	F	78	sCJD	MV	2	0	1	0	0	0	1	1	1	1	0	0	0	2500	62	225	PART
138	M	52	sCJD	VV	2	NA	NA	0	0	NA	1	1	1	1	0	1	1	1200	62	476	AGD
139	F	65	gCJD	MV	1	0	0	2	0	0	1	1	1	0	1	1	1	1200	53	533	PART
140	F	69	sCJD	VV	1	1	1	0	0	1	1	1	1	0	0	0	1	2500	73	1159	PART, AGD
141	M	68	sCJD	MM	1	0	1	0.5	0	1	1	1	0	0	1	0	0	223	44	255	AGD
142	F	61	sCJD	VV	1	1	1	0	0	1	1	0	1	1	0	0	1	1200	53	1092	AGD
143	F	74	sCJD	MM	1	0	1	1	1	0	1	1	1	1	1	1	0	2500	36	862	PART
144	F	62	sCJD	MM	1	1	1	0	0	0	1	1	1	0	0	1	1	2400	63	424	AGD
145	M	59	sCJD	MV	1	NA	NA	NA	NA	NA	1	1	1	0	0	0	1	947	70	946	AGD
146	M	76	sCJD	MV	1	1	1	1	2	1	1	1	1	0	0	0	0	2500	36	497	PART
147	M	70	sCJD	VV	1	NA	NA	NA	NA	NA	1	1	0	1	1	1	0	NA	NA	NA	PART, AGD
148	F	63	sCJD	MV	2	1	1	0	1	2	1	1	1	1	1	1	1	1200	72	497	AGD
149	F	54	gCJD	MM	1	1	1	0	0	0	1	1	0	1	0	1	1	1200	78	1070	AGD
150	M	70	sCJD	MM	1	0	1	0	0	2	1	1	1	0	1	1	1	NA	NA	NA	PART
151	F	53	sCJD	MM	1	1	1	0	0	0	1	1	0	1	0	1	1	1200	19	272	PART
152	F	68	sCJD	MM	1	1	1	1	2	0	1	1	0	0	0	0	1	2500	63	816	AGD
153	M	68	sCJD	MM	2	NA	NA	1	1	NA	1	NA	NA	NA	NA	NA	1	1300	59	668	PART
154	M	87	sCJD	MM	1	NA	NA	1	1	NA	1	1	1	1	0	0	1	NA	NA	NA	PART
155	M	72	sCJD	MM	1	1	1	1	1	1	1	1	0	1	1	1	1	NA	NA	NA	PART, AGD
156	M	77	sCJD	MM	2	1	1	1	2	0	1	1	1	0	0	0	1	1400	46	451	PART
157	M	74	sCJD	MM	1	1	0	1	2	2	1	0	1	1	1	1	1	NA	68	596	PART, AGD
158	F	69	gCJD	MM	1	1	1	1	1	1	1	1	1	1	0	1	1	NA	NA	NA	PART
159	M	74	sCJD	MV	2	0	1	1	2	2	1	1	1	0	0	0	0	1400	69	1317	PART
CJD + AD
No.	Sex	Age	CJD var.	Genotype	WB PrP	Putamen	Ribonning	Koedam	Scheltens	Fazekas	dementia	py/expy	cerebell/visuospat	myoclon	akinet mutism	EEG periodic	14 3 3	h-tau	p-tau	Aβ	AD ABC	AD level	Tauopathy
160	F	75	sCJD	VV	1	1	1	0	1	1	1	1	1	0	1	1	0	NA	NA	NA	A2B2C2	intermediate
161	F	74	sCJD	MV	1	1	1	0	1	0	1	1	1	1	1	0	1	1200	21	481	A1B1C1	low
162	M	59	sCJD	MM	1	1	1	0	0	1	1	1	1	1	0	0	0	1200	16	526	A1B1C2	low
163	F	68	sCJD	MM	1	0	1	1	1	2	1	1	0	0	1	0	1	NA	NA	NA	A2B2C2	intermediate
164	F	77	sCJD	MV	1	NA	NA	0	0	NA	1	1	1	1	1	0	1	NA	NA	NA	A2B1C2	low
165	M	64	sCJD	MM	2	0	0	0	1	0	1	1	1	1	0	0	1	NA	NA	NA	A1B1C1	low	ARTAG
166	M	79	sCJD	MM	1	1	1	2	2	1	1	1	0	1	0	1	1	1500	80	562	A2B2C2	intermediate	ARTAG
167	F	71	sCJD	MM	1	NA	NA	0	1	NA	1	1	1	1	1	1	1	1350	62	452	A2B1C2	low
168	M	61	sCJD	MM	1	1	1	1	1	1	1	1	1	1	0	1	1	NA	NA	NA	A1B1C1	low
169	F	67	sCJD	MM	1	1	1	1	1	0	1	1	0	1	1	1	1	1385	49	621	A2B1C1	low
170	M	70	sCJD	MM	1	0	1	1	2	1	1	1	0	1	0	1	1	NA	NA	NA	A2B1C1	low
171	F	74	sCJD	MM	1	0	0	1	1	2	1	0	0	0	0	1	1	NA	NA	NA	A2B1C1	low
172	F	65	sCJD	VV	1	1	1	1	1	1	1	1	1	1	0	0	1	NA	NA	NA	A1B2C1	low
173	M	75	sCJD	MM	1	1	1	1	2	2	1	1	1	1	0	0	0	NA	NA	NA	A2B2C2	intermediate	ARTAG
174	F	74	sCJD	VV	2	0	1	2	2	0	1	1	1	1	0	1	1	NA	NA	NA	A1B0C2	low
175	F	80	sCJD	VV	2	1	1	0	0	1	1	1	1	1	1	NA	1	1400	72	313	A3B1C2	low	AGD
176	F	75	sCJD	VV	1	NA	NA	0	0	NA	1	1	1	1	1	0	1	1200	92	870	A1B1C1	low
177	F	70	sCJD	MM	1+2	0	1	1	2	2	1	1	1	1	0	1	1	1500	110	508	A2B2C3	intermediate
178	M	83	sCJD	MM	1	0	0	2	1	3	1	1	1	1	0	1	1	1500	48	500	A2B2C2	intermediate	ARTAG
179	F	81	sCJD	MM	2	0	1	2	2	3	1	0	1	0	0	1	1	1200	39	446	A1B2C1	low	ARTAG
180	F	69	sCJD	MM	1	1	1	0	1	1	1	1	1	0	0	1	1	NA	NA	NA	A2B2C1	intermediate
181	F	65	sCJD	MM	1	0	0.1	0	0	0	1	1	0	1	1	1	1	1200	58	435	A2B2C2	intermediate
182	M	69	sCJD	MV	1	0	1	1	1	2	1	1	1	0	0	0	1	NA	NA	NA	A1B1C1	low
183	M	79	sCJD	MM	1	1	1	2	2	0	1	1	1	0	0	0	0	NA	NA	NA	A1B2C1	low
184	M	69	sCJD	MM	1	0	1	0	2	1	1	1	1	1	1	1	1	1200	36	341	A2B2C2	intermediate	ARTAG
185	F	62	gCJD	MM	2	0	1	0	1	0	1	1	1	1	1	NA	1	NA	NA	NA	A2B1C1	low	AGD
186	M	85	sCJD	MM	1	NA	NA	1	1	NA	1	1	1	1	0	NA	1	1400	69	426	A2B2C2	intermediate
187	M	77	sCJD	VV	1	0	0	2	2	0	1	1	1	0	0	NA	0	NA	NA	NA	A3B2C2	intermediate
188	M	62	sCJD	MV	2	1	1	1	1	0	1	1	1	1	1	1	1	1350	41	255	A3B2C2	intermediate
189	F	80	sCJD	MV	1	0	1	1	0	1	1	1	0	0	1	1	1	NA	NA	NA	A3B2C3	intermediate
190	M	64	sCJD	MV	1	0	1	1	1	0	1	1	0	1	1	0	1	1200	50	228	A2B2C2	intermediate
191	F	71	sCJD	MM	1	0	1	1	2	0	1	1	0	1	1	1	1	2500	63	609	A1B1C1	low
192	F	70	sCJD	MM	1	1	1	1	0	1	1	1	0	1	1	1	1	1200	49	680	A1B1C1	low	PART, AGD
193	F	71	sCJD	MM	1	0	0	1	1	2	1	1	1	0	1	NA	1	NA	NA	NA	A2B1C2	intermediate	ARTAG, AGD
194	F	65	sCJD	VV	1	1	1	0	0	2	1	0	1	1	0	0	1	1750	57	443	A1B2C1	low
195	M	64	gCJD	MV	1	NA	NA	2	0	NA	1	NA	NA	NA	NA	NA	1	NA	NA	NA	A2B0C2	not	ARTAG
196	F	69	sCJD	MM	1	1	1	1	1	1	1	1	1	1	0	1	1	1200	203	1047	A2B2C2	intermediate
197	F	72	sCJD	MV	2	NA	NA	0	0	NA	1	1	1	0	0	1	1	NA	NA	NA	A2B2C1	intermediate	AGD
198	M	75	sCJD	MM	1	NA	NA	0	2	NA	1	1	0	0	1	11	1	1700	37	181	A2B2C2	intermediate	ARTAG
199	F	70	sCJD	VV	1	1	1	1	1	0	1	1	1	1	1	1	1	1350	48	438	A2B2C2	intermediate
200	M	56	gCJD	MM	1	0	0	0	1	0	1	1	1	1	1	1	1	2500	23	805	A1B1C1	low
201	M	71	sCJD	MM	1	0	0	1	1	2	1	1	1	1	0	1	1	NA	NA	NA	A1B1C2	low	ARTAG
202	M	75	sCJD	MM	1	1	1	2	2	3	1	1	0	1	0	1	1	2500	52	772	A1B2C2	low
203	M	75	sCJD	VV	1	0	0	2	1	1	1	1	1	0	0	NA	0	NA	NA	NA	A2B2C1	intermediate	ARTAG
CJD + FTLD
No.	Sex	Age	CJD var.	Genotype	WB PrP	Putamen	Ribonning	Koedam	Scheltens	Fazekas	dementia	py/expy	cerebell/visuospat	myoclon	akinet mutism	EEG periodic	14 3 3	h-tau	p-tau	Aβ
204	F	55	sCJD	MM	1	1	1	0	0	0	1	1	1	1	1	1	1	1500	29	223
205	F	78	sCJD	VV	2	1	1	2	2	0	1	1	1	0	0	1	1	NA	NA	NA
206	F	59	sCJD	MM	2	0	1	1	0	1	1	1	1	0	1	0	1	1500	52	1080
207	F	59	sCJD	MM	1	1	1	1	1	2	1	1	1	1	1	0	1	2400	81	1201
208	M	74	sCJD	MM	1	1	1	1	2	3	1	1	0	1	1	1	1	1385	36	588
209	F	73	sCJD	VV	1	0	0	1	0	1	1	1	1	0	0	0	1	NA	NA	NA
210	M	67	sCJD	VV	1	1	1	1	2	1	1	1	1	0	0	0	0	NA	NA	NA
CJD + synucleinopathy
No.	Sex	Age	CJD var.	Genotype	WB PrP	Putamen	Ribonning	Koedam	Scheltens	Fazekas	dementia	py/expy	cerebell/visuospat	myoclon	akinet mutism	EEG periodic	14 3 3	h-tau	p-tau	Aβ
211	F	71	sCJD	MM	1	1	1	0	0	1	1	1	1	0	0	1	1	NA	NA	NA
212	M	76	sCJD	MM	1	1	1	2	2	1	1	1	0	1	1	1	1	1400	NA	NA
213	F	69	sCJD	VV	2	1	0	1	0	0	1	0	1	0	1	1	1	1385	64	676
214	F	59	sCJD	VV	1	1	1	0	1	0	1	1	1	1	1	0	1	NA	NA	NA
215	M	72	sCJD	MM	1	0	0	1	2	1	1	1	0	1	1	NA	0	1300	40	406
* No. - number of case;
CJD var. - variant of CJD (sporadic or genetic);
MM - Methionine/Methionine; MV - Methionine/Valine; VV - Valine/Valine polymorphism;
WB PrP - PrP type (1 or 2) stained by western blott;
Putamen - basal ganglia hyperintensities (putamen and caudate) in FLAIR and DWI sequences
Ribboning - cortical hyperintensities in FLAIR and DWI sequences
Koedam - parieto-occipital atrophy in MRI
Scheltens - mesial temporal atrophy
Fazekas - ischemic subcortical white matter lesions
Dementia - presence of dementia
Py/expy - presence of pyramidal / extrapyramidal signs
Cerebell/visuospat - cerebellar or visuospatial dysfunction,
Myoclon - myoclonus
Akinet mutism - akinetic mutism
EEG periodic - EEG periodicity
14 3 3 - 14 3 3 protein
